# Supplementary material for: Green, near-infrared electroluminescence of novel yttrium tetrazole complexes
Source: Royal Society of Chemistry journal article supplement (doi:10.1039/c2tc00411a), 2012-12-05

## Supplementary file

### Green, near infrared electroluminescence of novel tetrazole Yttrium complexes

Hashem Shahroosvand, Leyla najafi , Ezeddin Mohajerani, AmirKhabbazi, Mahmoud Nasrollahzadeh

#### S1.

CHN and ICP analysis were carried out to determine the presence of ligands and metal in the complexes. CHN analyses of compounds were obtained: Anal. Calc. for (1) , ( $C_{45}H_{33}N_{16}OY$ ) : C, 59.870; H, 3.684; N, 24.824. Found: C, 59.787; H, 3.612; N, 24.701%. Anal. Calc. for (2) , ( $C_{41}H_{33}N_{16}OY$ ) : C, 57.615; H, 3.891; N, 26.219. Found: C, 57.550; H, 3.812; N, 26.168% . Anal. Calc. for (3) , ( $C_{39}H_{28}N_{13}OSY$ ) : C, 57.425; H, 3.459; N, 22.322. Found: C, 57.389; H, 3.411 N, 22.275% . Anal. Calc. for (4) , ( $C_{35}H_{28}N_{13}OSY$ ) : C, 54.761; H, 3.676; N, 23.719. Found: C, 54.701; H, 3.598; N, 23.650%. Y was analyzed on a PLASMA-SPEC (I) ICP atomic emission spectrometer. A few mg of complexes (0.02g) were destroyed in  $HNO_3$  (68%) and finally diluted in water to 1:10 for being measured. The found concentrations for all complexes were estimated about 2.5-3 ppm.

S2: The current density (J) and luminance (L) at different applied voltage (V) characteristics of samples (1-4).

a : (mA/cm<sup>2</sup>), b : (cd/m<sup>2</sup>), J: Current density, L: Luminance

| V(V)      | (1)      |                | (2)            |                | (3)            |                | (4)            |                |
|-----------|----------|----------------|----------------|----------------|----------------|----------------|----------------|----------------|
|           | J        | L <sup>b</sup> | J <sup>a</sup> | L <sup>b</sup> | J <sup>a</sup> | L <sup>b</sup> | J <sup>a</sup> | L <sup>b</sup> |
| <b>1</b>  |          | 0              | --             | 0              | --             | 0              | 7.91E-3        | 0              |
| <b>2</b>  | 1.62796  | 0              | --             | 0              | 1.46E-08       | 0              | 55.2E-3        | 0              |
| <b>3</b>  | 3.54667  | 0              | 1.40333        | 0              | 0.00545        | 0              | 88.21E-3       | 0              |
| <b>4</b>  | 6.03397  | 0              | 2.83333        | 0              | 0.17092        | 0              | 1.021          | 0              |
| <b>5</b>  | 9.08985  | 0              | 3.95667        | 0              | 1.14           | 0              | 2.35           | 0              |
| <b>6</b>  | 12.71432 | 0.833          | 5.85667        | 0.833          | 1.664          | 0.833          | 2.987          | 0.8333         |
| <b>7</b>  | 16.54114 | 6.664          | 8.214          | 5.831          | 3.366          | 5.831          | 3.257          | 2.4999         |
| <b>8</b>  | 20.36784 | 9.996          | 12.0025        | 3.332          | 5.236          | 3.332          | 5.324          | 4.9998         |
| <b>9</b>  | 26.40121 | 14.994         | 17.74667       | 9.996          | 8.572          | 9.996          | 8.214          | 5.8331         |
| <b>10</b> | 35.16122 | 22.491         | 23.38          | 14.161         | 14.074         | 10.829         | 12.358         | 9.9996         |
| <b>11</b> | 48.65513 | 34.153         | 31.19333       | 21.658         | 20.25          | 15.827         | 16.325         | 13.3328        |
| <b>12</b> | 66.68737 | 48.314         | 44.41667       | 31.654         | 30.27          | 24.99          | 19.258         | 15.8327        |
| <b>13</b> | 86.65416 | 68.306         | 64.19333       | 49.98          | 40.488         | 33.32          | 22.358         | 19.1659        |
| <b>14</b> | 114.7008 | 91.63          | 83.52667       | 65.807         | 51.088         | 43.316         | 27.258         | 22.4991        |
| <b>15</b> | 150.739  | 123.284        | 109.86         | 89.964         | 66.194         | 56.644         | 35.329         | 30.8321        |
| <b>16</b> | 193.4462 | 160.769        | 137.7633       | 114.121        | 79.196         | 72.471         | 41.001         | 37.4985        |
| <b>17</b> | 242.8222 | 203.252        | 176.67         | 147.441        | 107.134        | 92.463         | 52.001         | 44.9982        |
| <b>18</b> | 298.8672 | 249.9          | 233.3367       | 198.254        | 139.02         | 122.451        | 59.254         | 51.6646        |
| <b>19</b> |          |                | 270.5133       | 228.242        | 162.129        | 142.443        | 70.142         | 62.4975        |

S3: The current density (J) versus applied voltages (V) characteristics of devices (1-4).

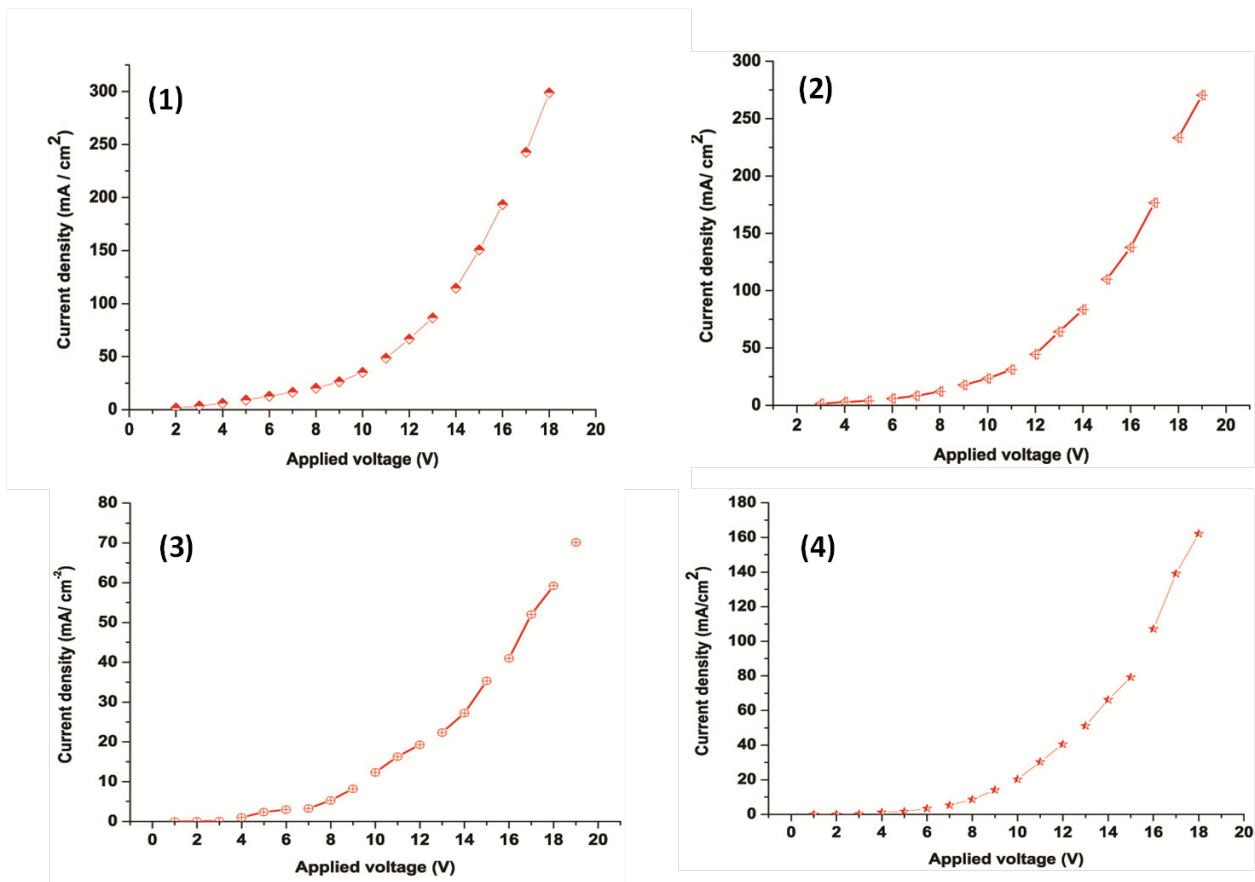

S4: The luminance (L) versus applied voltages (V) characteristics of samples (1-4)

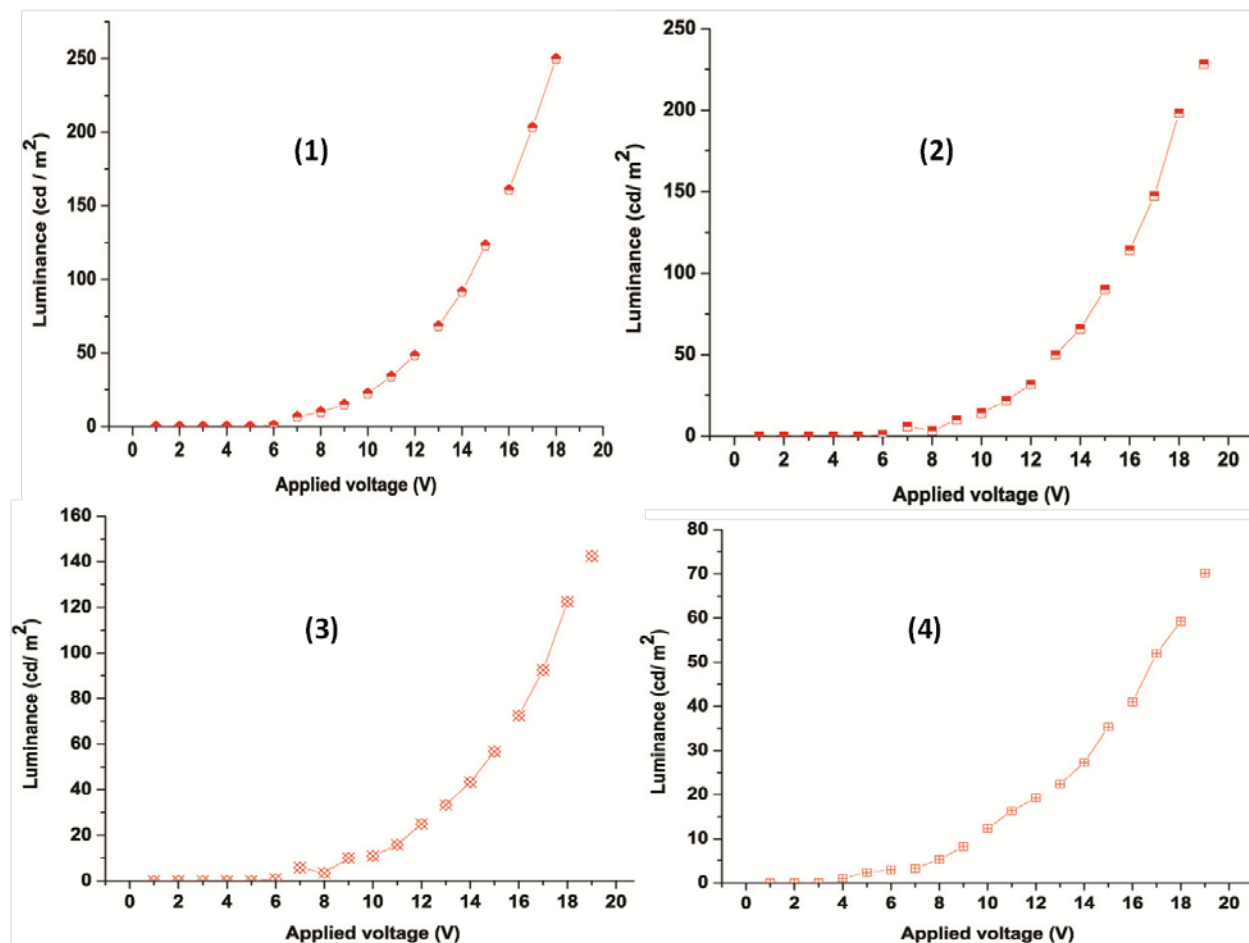

S5: The maximum efficiency(LE) versus applied voltages (V) characteristics of devices (1-4).

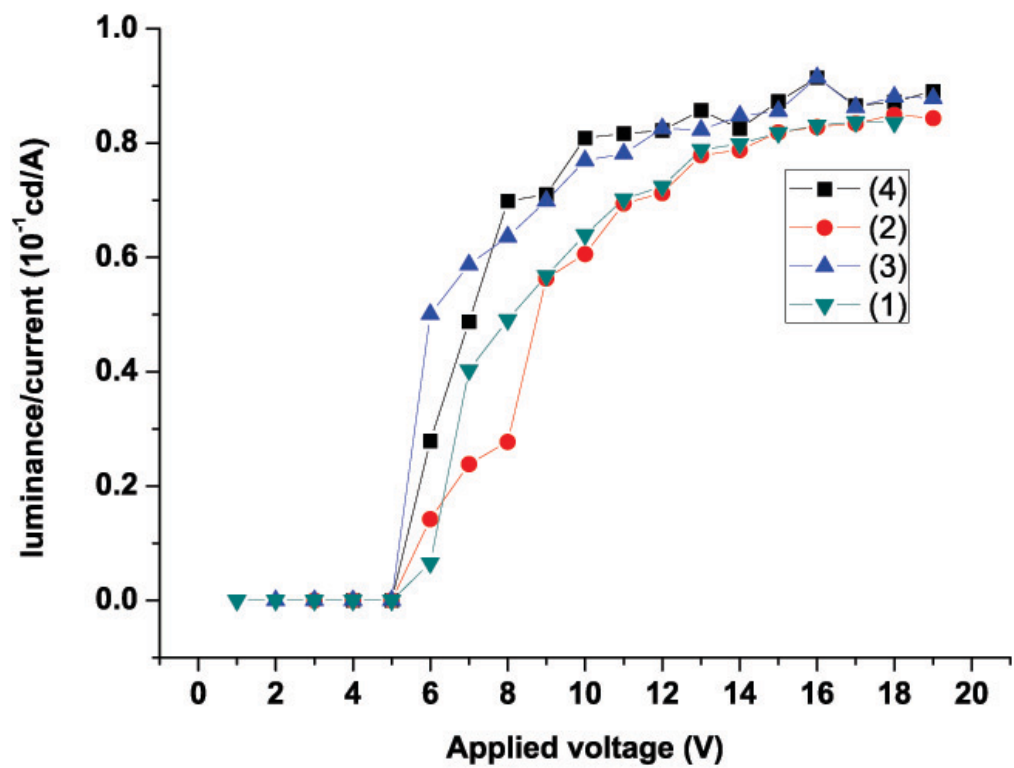

S6: The color coordinates in the Commission Internationale del'Eclairage (CIE 1931) chromaticity chart and the full width at half-maximum (FWHM ) and the correlated color temperature (CCT).

| No. | (x <sub>r</sub> ) | (Y)   | FWHM (nm) | CCT (K) | Turn on (V) |
|-----|-------------------|-------|-----------|---------|-------------|
| (1) | 0.409,            | 0.402 | 180       | 3502    | 6           |
| (2) | 0.410             | 0.403 | 186       | 3502    | 6           |
| (3) | 0.352             | 0.380 | 236       | 4830    | 9           |
| (4) | 0.367             | 0.391 | 239       | 4845    | 10          |

S7: Near Infra Red El spectra of device (1) at different applied voltages.

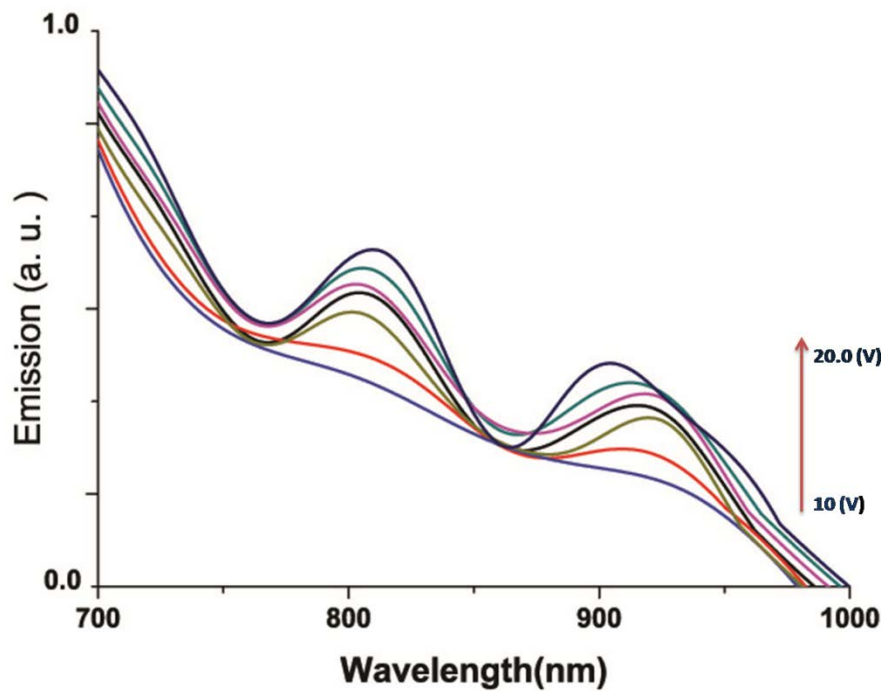

Supplement: c2tc00411a.pdf [file c2tc00411a.pdf]
